# Supplementary material for: Dietary Iron Overload and Hfe−/− Related Hemochromatosis Alter Hepatic Mitochondrial Function
Source: MDPI journal article supplement (doi:10.3390/antiox10111818), 2021-11-16
Supplement: s1 [file s1]

Supplementary Materials:

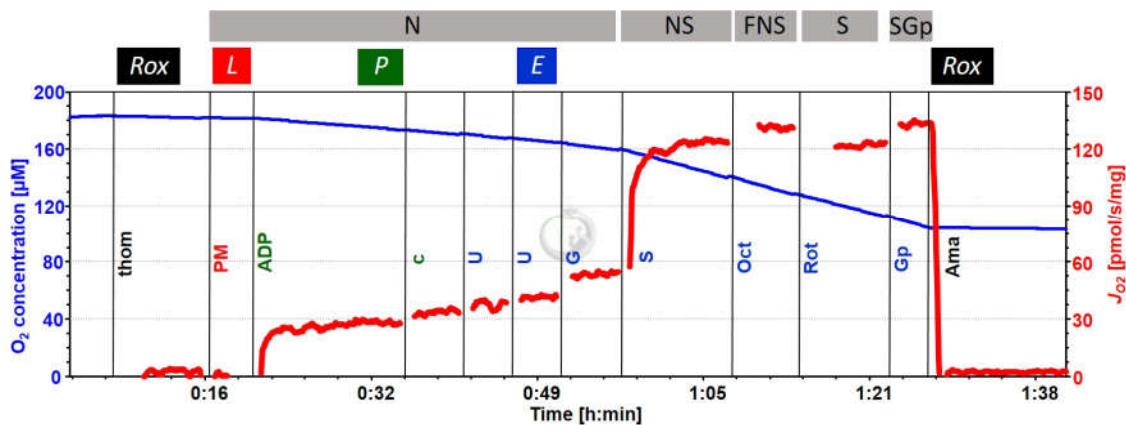

**Figure S1.** Representative trace of substrate-uncoupler-inhibitor titration (SUIT) protocol for measurement of liver mitochondrial respiration using high-resolution respirometry. Residual oxygen consumption (*Rox*) measured in the presence of liver homogenate (*thom*); pyruvate and malate (*PM*) in the absence of adenosine diphosphate (*ADP*) to measure NADH-linked (*N*) LEAK-respiration (*L*); kinetically saturating concentration of *ADP* to measure OXPHOS-capacity (*P*); cytochrome *c* (*c*) to detect mitochondrial outer membrane integrity; uncoupler titrations (*U*) to measure electron transfer (*ET*) capacity (*E*); glutamate (*G*) to measure *N*-linked *ET* capacity; succinate (*S*) to measure *NS*-linked *ET* capacity; octanoylcarnitine (*Oct*) to detect *FNS*-linked *ET* capacity; Complex I inhibitor rotenone (*Rot*) to measure *S*-*ET* capacity; glycerol-3-phosphate (*Gp*) to measure *SGp*-*ET* capacity; antimycin A (*Ama*) to detect *Rox*. Experiment 2021-02-01 PS1-01 WT ND 1:  $O_2$  concentration (blue trace) and  $O_2$  flux per mass (red trace).

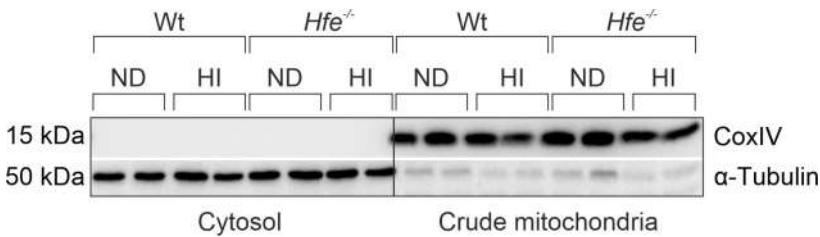

**Figure S2.** Representative Western blot of isolated liver fractions to ensure their purity. Mitochondrial protein cytochrome *c* oxidase subunit 4 (*CoxIV*) and cytosolic protein  $\alpha$ -Tubulin.
